# Supplementary material for: CRISPR-mediated control of the bacterial initiation of replication
Source: PubMed Central journal article supplement — Nucleic Acids Res. 2016 Apr 1;44(8):3801–10. doi: 10.1093/nar/gkw214 (PMC4857001; doi:10.1093/nar/gkw214), 2016-04-01
Supplement: supp_gkw214_nar-00231-h-2016-File007.pdf [file supp_gkw214_nar-00231-h-2016-File007.pdf]

## **SUPPLEMENTARY MATERIAL**

SI to the paper entitled "CRISPR-mediated control of the bacterial initiation of replication",  
by Jakub Wiktor, Christian Lesterlin, Dave J. Sherratt, Cees Dekker

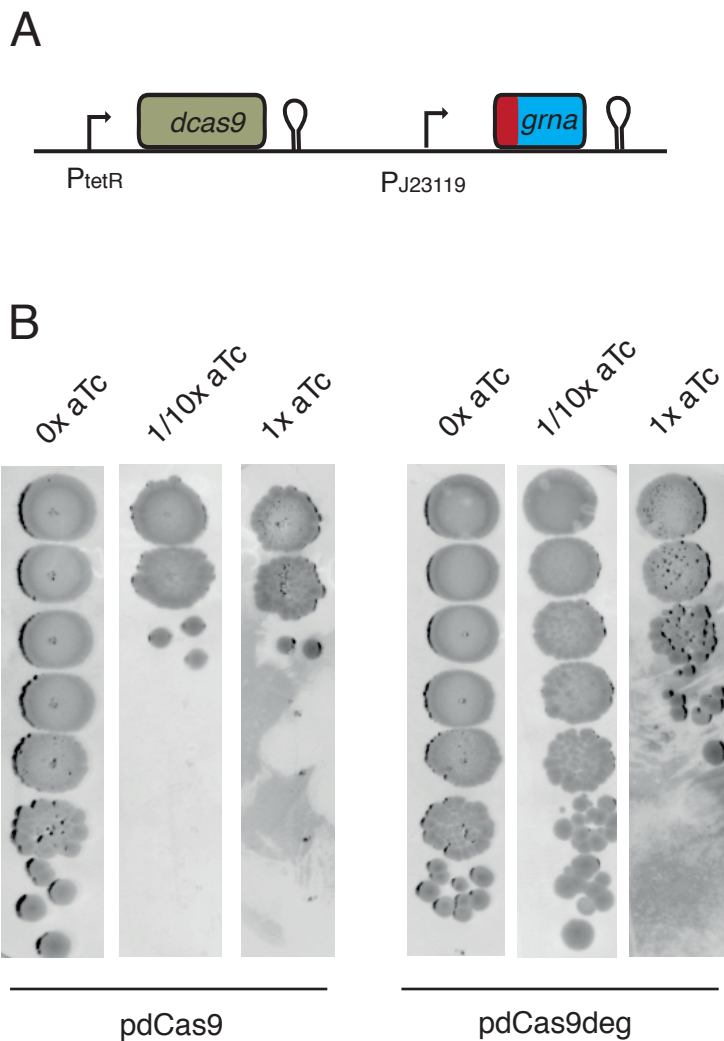

**Supplementary Figure S1.** Creation of the pdCas9deg3 plasmid. **(A)** A pdCas9deg3 plasmid consist of *dCas9deg*-coding gene under the control of an aTc inducible promoter and a *sgRNA*-coding gene under the control of the constitutive promoter with the p15a origin of replication. **(B)** dCas9deg protein is observed to be less effective in inhibiting the replication than dCas9 that is lacking the degradation tag. Serial ten-fold dilutions of liquid bacterial cultures were plated either on the media supplemented with 20ng/ml or 200ng/ml of aTc or lacking aTc. Cells were also co-transformed with pgRNA3.

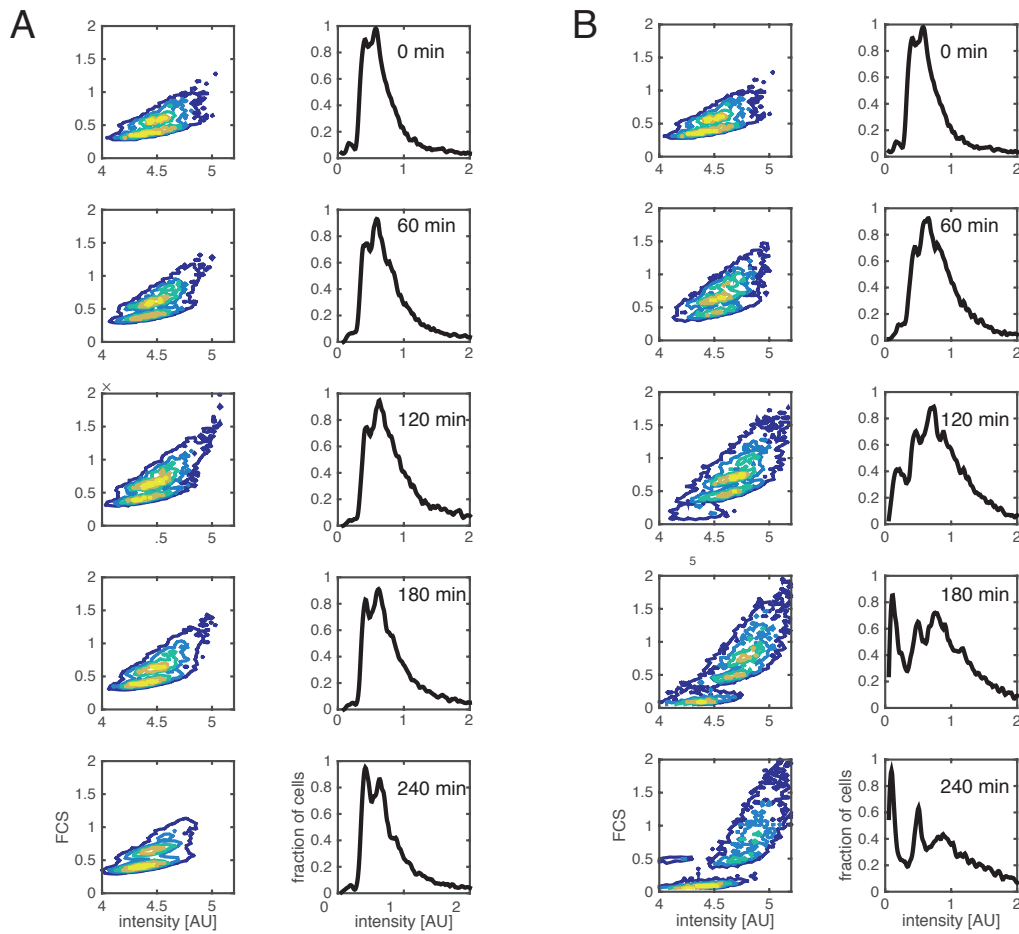

**Supplementary Figure S2.** The two-plasmid system does not preserve the cell physiology well. CRISPR/dCas9 system was expressed from two plasmids, pdCas9deg and pgRNA. Cells were grown in M9 glucose at 37°C. Early exponential culture was induced with 200ng/ml of aTc and analyzed with flow cytometer every 60 minutes. DNA was stained with Syto16. **(A)** Uninduced culture maintains a constant DNA/cell concentration throughout the experiment. **(B)** The induced culture shows an anomalous distribution of cell sizes. The increasing population of small, but highly fluorescent cells suggests that overexpression of CRISPR/dCas9deg system binding to the *oriC* has negative effects on the bacterial cells.

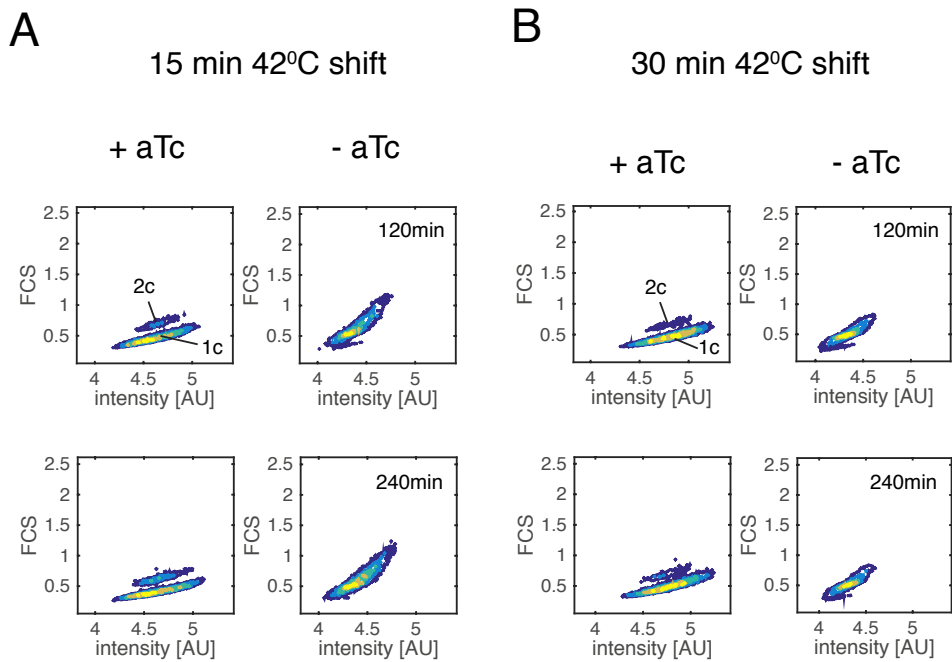

**Supplementary Figure S3.** Short temporal shift of CRISRP/dCas9deg3 arrested cells to high temperature does not promote replication reinitiation. Cells transformed with pdCas9deg3 were grown in M9 media with 0.2% glucose, and arrested by addition of 200ng/ml aTc for 3h before the pulse of temperature shift. Before shifting to 42°C cells were diluted 10x in the fresh M9 media without aTc and analyzed by FACS 2h and 4h after the shift. **(A)** 15 minute incubation in 42°C and subsequent growth in 37°C did not result in the replication reinitiation. Culture induced with aTc showed the arrested phenotype, whereas non-induced cultures showed the replicating cell phenotype. **(B)** Same as in (A), but the cultures were incubated at 42°C for 30 minutes before subsequent growth at 37°C.

GTTGGTTCTCCAGCGCGTACGTACCGCTGACGGTAGAGCACACGATCCGCCTGAGCTCGGGTAGCGCGAACCGC  
 CGGTCCCTTGCTTGCCTTAGTATCCTAAACTGGATACCCGCTGATCGATCGCTTTCGCCATCAGACCGCGAGT  
 GCATCCACTTCTTTACCAGATGTCCCTTCCCAATACCGCGATCGCCGGTTGCAGCTCATCTGCCCCAGAGTGT  
 CGATATTGTGTGTCAAAAGCAGAGTCTGTGACCCATACGCGCCGCGCCATCGCGGCTCGGTGCCTGCATGACC  
 CCCGCCAATGATGATGACGTCAAAGGATCCGGATAAACATGGTGTATTGCCATACCGGGTATGAAAATGG

\_\_\_\_\_ gRNA7 \_\_\_\_\_ gRNA6  
**ATTGAAGCCCGGGCCGTGGATTCTACTCAACTTTGTTCGGCTTGAGAAAGACTGGGATCCTGGGTATTAAGAA**

\_\_\_\_\_ gRNA5 \_\_\_\_\_ gRNA2 \_\_\_\_\_ gRNA1  
**GATCTATTTATTTAGAGATCTGTCTATTGTGATCTCTTATTAGATCGCACTGCCCTGTGGATAACAAGGATCCG**

\_\_\_\_\_ gRNA12 \_\_\_\_\_ gRNA3  
**GCTTTTAAGATCAACAACCTGGAAAGGATCATTAACTGTGAATGATCGGTGATCCTGGACCGTATAAGCTGGGATC**

\_\_\_\_\_ gRNA13  
**AGAATGAGGGTTATACACAACCTCAA**AAACTGAACAACAGTTGTCTTTGGATAACTACCGGTGATCCAAGCTTC

\_\_\_\_\_ gRNA10  
**CTGACAGAGTTATCCACAGTAGAT**CGCACGATCTGTATACTTATTGAGTAAATTAACCCAGATCCCAGCCATTTC

\_\_\_\_\_ gRNA4  
 TTTCGCCGGATCTCCGGAATGTCGTGATCAAGAATGTTGATCTTCAGTGTTCGCCTGTCTGTTTTGCACCGGAA  
 TTTTGTAGTCTGCCTCGAGTTTATCGATAGCCCCACAAAAGGTGTCATATTCACGACTGCCAATACCGATTGCGC  
 CAAAGCGGACTGCAGAAAGATCGGGCTTCTGTCTCCTGCAATGCTTCATAGAAAAGGAGAAAAGTTGTCCGGAATATC  
 TCCGGCACCGTGGGTGGAGTGATAACCAGCCAGATCCCTGAGGCAGGTAATCTTCTAACAGCGGACCGTGCAGC  
 GTTTCGGTGGTAAAACCCGCTCTCCAGCTTTCAGCCAGGTGTTCTGTACATATTCGCCACCGCCGAGGGTGC  
 TGCCGTGATAAGAGTGATATCTGCCATAAACCCGACCTTTATTAAGAGTG

**Supplementary Figure S4.** Detailed genetic map of the origin of replication, and surrounding sequence, with gRNA targets indicated. Constructs targeting top strands are depicted on the top of the sequence; constructs targeting bottom strands are shown as lines at the bottom of the sequence. Red – high-affinity DnaA boxes; green – AT rich region; purple – parts of gene-coding regions flanking the *oriC*.

**Table S1. Plasmids**

| <b>Name</b>    | <b>Genotype</b>                                                              | <b>Reference</b> |
|----------------|------------------------------------------------------------------------------|------------------|
| pdCas9         | p15a origin, P <sub>tetA</sub> - <i>dCas9</i>                                | Addgene, (23)    |
| pgRNA          | ColE1 origin, P <sub>J23119</sub> -gRNA                                      | Addgene, (23)    |
| pdCas9deg      | p15a origin, P <sub>tetA</sub> - <i>dCas9deg</i> ( <i>AANDENYALAA</i> )      | This study       |
| pdCa9deg-gRNA3 | p15a origin, P <sub>tetA</sub> - <i>dCas9deg</i> , P <sub>J23119</sub> -gRNA | This study       |
| pgRNA1         | CCCTGTGGATAACAAGGATC                                                         | This study       |
| pgRNA2         | GCACTGCCCTGTGGATAACA                                                         | This study       |
| pgRNA3         | GCCGGATCCTTGTATCCACA                                                         | This study       |
| pgRNA4         | CTACTGTGGATAACTCTGTC                                                         | This study       |
| pgRNA5         | TTCTATTGTGATCTCTTATT                                                         | This study       |
| pgRNA6         | TTGAGAAAGACCTGGGATCC                                                         | This study       |
| pgRNA7         | ATGGATTGAAGCCCGGGCCG                                                         | This study       |
| pgRNA8         | ATTGTACGCTGTGAACGCGT                                                         | This study       |
| pgRNA9         | CACGGAACTTCAGTCCCATT                                                         | This study       |
| pgRNA10        | GTCAGGAAGCTTGGATCAAC                                                         | This study       |
| pgRNA11        | GAGGCAGAACTCAAAAATTC                                                         | This study       |
| pgRNA12        | GATCATTAAGTGAATGAT                                                           | This study       |
| pgRNA13        | AGCTTATACGGTCCAGGATC                                                         | This study       |
| pgRNA14        | TTGCGTTTAGTATCCTAAAC                                                         | This study       |
| pgRNA15        | ATGAGCTGCAACCCGGCGAT                                                         | This study       |
| pgRNActrl      | CCGCCGTGTCACCTTCGCTTTGG                                                      | This study       |

**Table S2. Oligonucleotides** (displayed on next page)

Underline in pgRNA oligonucleotides indicate targeted sequence

| Name  | Sequence (5' – 3')                                                   | Purpose                |
|-------|----------------------------------------------------------------------|------------------------|
| JW096 | GGACTAGTATTATACCTAGGACTGAG                                           | pgRNA cloning reverse  |
| JW090 | CCACTAGT <u>CCGCCGTGCAC</u> <u>TTTCGCTT</u> GTTTTAGAGCTAGAAATAGCAAG  | pgRNA ctrl integration |
| JW092 | CCACTAGT <u>CCCTGTGGATAACAAGGATCG</u> TTTTAGAGCTAGAAATAGCAAG         | pgRNA 1 integration    |
| JW093 | CCACTAGT <u>GCACTGCCCTGTGGATAACA</u> GTTTTAGAGCTAGAAATAGCAAG         | pgRNA 2 integration    |
| JW094 | CCACTAGT <u>GCCGGATCCTTGTATCCACAG</u> TTTTAGAGCTAGAAATAGCAAG         | pgRNA 3 integration    |
| JW095 | CCACTAGT <u>CTACTGTGGATAACTCTGTCG</u> TTTTAGAGCTAGAAATAGCAAG         | pgRNA 4 integration    |
| JW098 | TAACTCGAGTAAGGATCTCCAG                                               | pdCas9 for             |
| JW099 | CCCTCGAGTTAAGCAGCCAGAGCGTAGTTTTCGTCGTTAGCAGCGTCACCTC<br>CTAGCTGACTCA | pdCas9 LAA             |
| JW121 | TACCTAGGGATATATCCGCTTCCCTAAAGATCTTTGACAGCTAGCTC                      | pgRNA for CPEC         |
| JW122 | GACCGAGCGTAGCGAGTCGGATCCAGTTCACCGACAAAC                              | pgRNA rev for CPEC     |
| JW124 | GACTCGCTACGCTCGGTC                                                   | pdCas9 for CPEC        |
| JW125 | GGAAGCGGAATATATCCCTAG                                                | pdCas9 rev CPEC        |
| JW148 | CCACTAGT <u>TTCTATTGTGATCTCTTATTG</u> TTTTAGAGCTAGAAATAGCAAG         | pgRNA 5 integration    |
| JW149 | CCACTAGT <u>TTGAGAAAGACCTGGGATCCG</u> TTTTAGAGCTAGAAATAGCAAG         | pgRNA 6 integration    |
| JW150 | CCACTAGT <u>ATGGATTGAAGCCCGGCCG</u> TTTTAGAGCTAGAAATAGCAAG           | pgRNA 7 integration    |
| JW151 | CCACTAGT <u>ATTGTACGCTGTGAACGCGT</u> TTTTAGAGCTAGAAATAGCAAG          | pgRNA 8 integration    |
| JW154 | CCACTAGT <u>CACGGAAC TTCAGTCCCATTG</u> TTTTAGAGCTAGAAATAGCAAG        | pgRNA 9 integration    |
| Jw158 | CCACTAGT <u>GTCAGGAAGCTTGGATCAAC</u> GTTTTAGAGCTAGAAATAGCAAG         | pgRNA 10 integration   |
| Jw159 | CCACTAGT <u>GAGGCAGAACTCAAAAATTCG</u> TTTTAGAGCTAGAAATAGCAAG         | pgRNA 11 integration   |
| Jw160 | CCACTAGT <u>GATCATTAACTGTGAATGATG</u> TTTTAGAGCTAGAAATAGCAAG         | pgRNA 12 integration   |
| Jw161 | CCACTAGT <u>AGCTTATACGGTCCAGGATCG</u> TTTTAGAGCTAGAAATAGCAAG         | pgRNA 13 integration   |
| Jw162 | CCACTAGT <u>TTGCGTTTAGTATCCTAAACG</u> TTTTAGAGCTAGAAATAGCAAG         | pgRNA 14 integration   |
| Jw163 | CCACTAGT <u>ATGAGCTGCAACCCGGCGATG</u> TTTTAGAGCTAGAAATAGCAAG         | pgRNA 15 integration   |
